# Supplementary material
Source: publisher figshare collection journal article supplement (https://acs.figshare.com/ndownloader/files/13753262)
Supplement: Supplementary file 3 [file 13753262]

# Permission Request Form for Use of *Individual and/or Group Photos* in *ACS LiveSlides* from Copyright Owners/Publishers/Photographers Other Than ACS

Date: 27 Nov 2018

To: Massarotti Alberto  
Publisher's/Copyright Owner's Contact Information  
  
  
  
Publisher's/Copyright Owner's Email Address

From: Massarotti Alberto  
Your Name and Complete Mailing Address  
Dipartimento di Scienze del Farmaco  
Largo Donegani 2, 28100 Novara (Italy)  
  
(+39) 0321 375 753  
Your Phone Number Including Country and City Codes  
alberto.massarotti@uniupo.it  
Your Email Address  
01 Dec 2018  
Your Specific Deadline Date

I am preparing an *ACS LiveSlides* entitled:

ZINClick v.18: Expanding Chemical Space of 1,2,3-Triazoles

to appear with

ZINClick v.18: Expanding Chemical Space of 1,2,3-Triazoles (DOI: 10.1021/acs.jcim.8b00615)

Title of ACS Publication and DOI

which is published by the American Chemical Society, a not-for-profit membership society and a STM signatory.

I would appreciate your permission to use the following material in all formats including but not limited to print, microform, electronic, and/or CD-ROM from the following reference:

## Individual Photographs of the Following Individuals:

Levré Dorian, Arcisto Chiara, Mercalli Valentina, Massarotti Alberto

## Collective Photograph (s) representing the following groups:

-

If you, the photographer, have a required **credit line**, please include it below:

-

For your convenience, you may sign and date the bottom of this letter to indicate your agreement. Please return this form to me at the above email address, by the above **deadline date** (if given above). Thank you.

Agreed:

Alberto Massarotti  
Publisher's/Copyright Owner's Signature or Stamp

Date:

27 Nov 2018  
Date

**SIGN HERE**

Submit completed and signed form with your signed *ACS LiveSlides* Video Release.

7/25/16
